1  
2  
3  
4  
5  
6  
7  
8  
9  
10  
11  
12  
13  
14  
15  
16  
17  
18  
19  
20  
21  
22  
23  
24  
25  
26  
27  
28  
29  
30  
31  
32  
33  
34  
35  
36  
37

# Atlantic Cod (*Gadus morhua* L.) *In Situ* Cardiac Performance at Cold Temperatures: Long-Term Acclimation, Acute Thermal Challenge and the Role of Adrenaline

Glenn J. Lurman<sup>1,+</sup>, Lene H. Petersen<sup>1,†</sup> and A. Kurt Gamperl<sup>1\*</sup>

<sup>1</sup> - Alfred-Wegener-Institut für Polar- und Meeresforschung, P.O. Box 120161, 27515 Bremerhaven, Germany.

<sup>+</sup> - Current Address: Institute of Anatomy, University of Bern, Baltzerstrasse 2, CH-3012 Bern, Switzerland.

<sup>2</sup> - Ocean Sciences Centre, Memorial University of Newfoundland, St. John's, NL, Canada. A1C 5S7.

<sup>†</sup> – Current Address: Dept. of Biology, University of North Texas, 1155 Union Circle, Denton, TX. 76203 U.S.A.

\* Author for correspondence:

A. Kurt Gamperl,  
 Ocean Sciences Centre,  
 Memorial University of Newfoundland,  
 St. John's, NL, Canada. A1C 5S7.  
 (Phone) 709-864-2692  
 (FAX) 709-864-3220  
 (e-mail: kgamperl@mun.ca)

**Running head:** Cod cardiac function in the cold

**Keywords:** cod, heart, heart rate, cardiac output, temperature, adrenergic stimulation, catecholamines

## 38 SUMMARY

39

40 The resting and maximum *in situ* cardiac performance of Newfoundland Atlantic cod  
 41 (*Gadus morhua* L.) acclimated to 10, 4 and 0°C were measured at their respective acclimation  
 42 temperatures, and when acutely exposed to temperature changes: i.e. hearts from 10°C fish  
 43 cooled to 4°C, and hearts from 4°C fish measured at 10°C and 0°C. Intrinsic heart rate ( $f_H$ ),  
 44 decreased from 41 beats min<sup>-1</sup> (bpm) at 10°C to 33 bpm at 4°C and to 25 bpm at 0°C.  
 45 However, this degree of thermal dependency was not reflected in maximal cardiac output.  
 46  $Q_{max}$  values were ~ 44, ~ 37 and ~ 34 mL min<sup>-1</sup> kg<sup>-1</sup> at 10, 4 and 0°C, respectively. Further,  
 47 cardiac scope showed a slight positive compensation between 4 and 0°C ( $Q_{10} = 1.7$ ), and full,  
 48 if not a slight over compensation between 10 and 4°C ( $Q_{10} = 0.9$ ). The maximal performance  
 49 of hearts exposed to an acute decrease in temperature (i.e. from 10°C to 4°C and 4°C to 0°C)  
 50 was comparable to that measured for hearts from 4 and 0°C acclimated fish, respectively. In  
 51 contrast, 4°C acclimated hearts significantly out-performed 10°C acclimated hearts when  
 52 tested at a common temperature of 10°C (in terms of both  $Q_{max}$  and power output). Only  
 53 minimal differences in cardiac function were seen between hearts stimulated with basal (5  
 54 nM) vs. maximal (200 nM) levels of adrenaline, the effects of which were not temperature  
 55 dependant. These results: 1) show that maximum performance of the isolated cod heart is not  
 56 compromised by exposure to cold temperatures; and 2) support data from other studies which  
 57 show that, in contrast to salmonids, cod cardiac performance/myocardial contractility is not  
 58 dependent upon humoral adrenergic stimulation.

59 **INTRODUCTION**

60 Temperature is a critical environmental factor that influences all life functions through  
61 changes in the rates of biochemical and physiological processes, and alterations in the  
62 stability of biological molecules. Consequently, the thermal tolerance range of aquatic  
63 organisms has been studied for decades (e.g. Brett, 1971; Fry, 1971; Beitenger et al., 2000;  
64 Pörtner, 2001), and there is accumulating evidence that: 1) the thermal tolerance of marine  
65 organisms (including fishes) is limited by blood oxygen transport and aerobic scope; and 2) at  
66 the limits of acclimation capacity, temperature dependent constraints on these physiological  
67 processes translate into alterations in population dynamics and biogeography (Pörtner et al.,  
68 2001; Pörtner 2002; Pörtner and Knust, 2007; Farrell, 2009; Pörtner, 2010; Eliason et al.,  
69 2011). Although it is difficult to determine the thermal limits of marine organisms under field  
70 conditions, studies on the influence of acclimation/acclimatization on physiological  
71 mechanisms/processes and thermal tolerance can be very insightful (Sokolova and Pörtner,  
72 2003; Stillman, 2003, Seebacher et al., 2005; Franklin et al. 2007). For example, these latter  
73 authors reported that even archetypical stenothermal fish (e.g. the Antarctic fish *Pagothenia*  
74 *borchgrevinki*) display considerable plasticity in cardiovascular and metabolic control, and  
75 swimming performance, as a result of temperature acclimation.

76 Based on the above, it is clear that additional research is needed on how acclimation  
77 temperature and thermal history influence the temperature limits of various fish species, and  
78 on what physiological processes mediate thermal tolerance. Thus, in this study, we used an *in*  
79 *situ* heart preparation to examine how acclimation to 10, 4 and 0°C, and acute temperature  
80 changes (10 to 4°C, 4 to 10°C, and 4 to 0°C), influence maximum cardiac performance in  
81 Atlantic cod. In our experiments, we chose temperatures below 10°C to examine the  
82 relationship between cardiac function and temperature because cod that inhabit the continental  
83 shelf off Atlantic Canada typically face water temperatures between 0.7 and 8 °C (Lear, 1984;  
84 Clark and Green, 1991), and these temperatures span those used by Claireaux et al. (2000) to  
85 examine the influence of acclimation temperature on cod aerobic scope. Our research  
86 complements previous work as there are currently no data on cod cardiac performance below  
87 5°C. In addition, to our knowledge, only one study (Axelsson et al., unpubl; data presented in  
88 Axelsson, 2005) has measured maximum cardiac performance/cardiac scope in a non-  
89 Antarctic teleost at temperatures of, or approaching, 0°C.

90 This study also addresses the role that circulating catecholamines play in regulating  
91 temperature-dependent cardiac performance in cod. Specifically, data on 10°C acclimated  
92 Atlantic cod (Axelsson, 1988) suggest that adrenaline is not required for basal or maximum

cardiac performance, whereas studies on several teleosts show that adrenergic sensitivity is a critical compensatory mechanism that enables the fish myocardium to maintain contractility during acute cold exposure (e.g. Franklin and Davie, 1992; Keen et al, 1993; Aho and Vornanen, 2001; Shiels et al., 2003; Galli et al., 2009), hypoxia, and alterations in blood chemistry that are associated with intense exercise (Hanson et al., 2006). However, the apparent lack of myocardial responsiveness to adrenaline in cod may be due to the fact that only a single experimental temperature (10°C) has been examined to date. For example, research on other teleosts indicates that acclimation to ‘warm’ temperatures or those within a fish’s optimal thermal range may reduce myocardial adrenergic sensitivity and/or adrenoceptor density (Graham and Farrell, 1989; Keen et al., 1993; Shiels et al., 2003; Farrell et al., 2007). Thus, by examining the effects of adrenergic stimulation on maximum cardiac performance at several temperatures (0, 4 and 10°C), we were able to further evaluate what role circulating catecholamines play in supporting cod cardiac performance, and indeed, whether this species differs from other teleosts in this regard.

107

## 108 MATERIALS AND METHODS

109 This research conformed to the guidelines published by the Canadian Council on  
110 Animal Care and was approved by Memorial University’s Institutional Animal Care  
111 Committee (Protocol 04-01-KG).

112

### 113 *Experimental Animals*

114 The mixed gender, 2 year +, Atlantic cod *Gadus morhua* L. used in this study were  
115 transported from a sea-cage facility at Northwest Cove (Hermitage Bay, Newfoundland,  
116 Canada) to the Aquaculture Research Development Facility (ARDF) at the Ocean Sciences  
117 Centre in St John’s, Newfoundland in March 2006. The fish were held in 3000 L tanks in the  
118 ARDF supplied with aerated seawater at 10°C for 3-4 month’s post-transfer, and then  
119 acclimated to 10, 4 and 0 – 1 °C for at least 6 weeks prior to experimentation; water  
120 temperature lowered by 1°C every 2-3 days until the desired temperature was reached. While  
121 at the ARDF the cod were fed a commercial cod diet daily, and maintained under ambient  
122 photoperiod.

123

124

125

126

## ***Surgical Procedures***

*In situ* heart preparations were obtained for the cod with only minor modifications of the protocol of Farrell et al. (1982), as described in Mendonca et al. (2007). The fish was then bisected just posterior to the pectoral fins, placed in a water-jacketed saline-filled bath maintained at the fish's acclimation temperature, and the input and output cannulae were immediately connected to a tube delivering perfusate at constant pressure, and to tubing whose height could be adjusted to control the end-diastolic pressure developed by the ventricle, respectively. The saline contained [in g L<sup>-1</sup>]: 10.5 NaCl; 0.49 MgSO<sub>4</sub>\*7H<sub>2</sub>O; 0.37 KCl; 0.34 CaCl<sub>2</sub>\*2H<sub>2</sub>O; 0.14 NaH<sub>2</sub>\*PO<sub>4</sub>\*H<sub>2</sub>O; 1.84 Sodium TES base; 0.59 TES acid; 1.0 glucose, pH 7.67 at 20°C. Shortly before use, 250 µL of 0.1 µM adrenaline bitartrate salt (AD) dissolved in distilled H<sub>2</sub>O was added to 500 mL of saline to give a final concentration of 5 nM AD, a concentration similar to resting plasma concentrations in Atlantic cod (Wahlqvist and Nilsson, 1980). Alternatively, 500 µL of 2 µM AD was added to obtain a final concentration of 200 nM AD, this concentration designed to mimic maximal *in vivo* concentrations measured in stressed fish (Wahlqvist and Nilsson, 1980). Adrenaline was added to fresh (0 nM adrenaline) perfusate bottles every 20 min to avoid photo-degradation, and thus loss of potency.

## ***Cardiac Performance Tests***

See Figure 1 for a graphical representation of the complete protocol. After mounting the *in situ* preparation in the experimental bath the heart was allowed to recover from surgery at the acclimation temperature for about 5-10 minutes at an output pressure (P<sub>OUT</sub>) of 2 kPa and input pressure (P<sub>IN</sub>) was continuously adjusted to maintain a Q of 16, 10 or 8 mL min<sup>-1</sup> kg<sup>-1</sup> at 10, 4 and 0°C, respectively. These values were estimates of *in vivo* resting Q based on published values for cod at various temperatures (Webber et al., 1998). After this initial period, P<sub>OUT</sub> was increased to a physiological level of 5 kPa (Petersson and Nilsson, 1980; Axelsson and Nilsson, 1986), and the hearts were allowed to stabilize for a further 20 min. at resting Q and P<sub>OUT</sub>. Thereafter, the temperature was changed in those hearts subjected to an acute thermal challenge (i.e. from 10 to 4°C or from 4°C to 10 or 0°C) over 60 min., and they were allowed an additional 20 min. to stabilize at their final test temperature before their maximum performance was assessed. An equivalent period under resting conditions was allowed for hearts tested at their acclimation temperature to control for any deteriorations in cardiac function with time.

For all hearts, a maximum cardiac output ( $Q_{\max}$ ) test was initially performed at 5 nM AD by increasing input pressure in steps from resting values to 0.4, 0.5, 0.55, and finally 0.6 kPa. Each increase in  $P_{\text{IN}}$  was held for approximately 30 seconds, and output pressure maintained at 5 kPa. Then,  $P_{\text{IN}}$  was left at 0.6 kPa and a maximum power output ( $PO_{\max}$ ) test performed by decreasing  $P_{\text{OUT}}$  to 2 kPa and increasing it in 1 kPa steps until 8 kPa. Following these initial  $Q_{\max}$  and  $PO_{\max}$  tests, the hearts were allowed to recover under resting conditions for 20 minutes, and then the perfusate AD concentration was changed from 5 nM to 200 nM, and after 3 minutes resting parameters were recorded and the  $Q_{\max}$  and  $PO_{\max}$  tests were repeated as described above. Finally, the hearts were removed from all fish so that ventricular mass and relative ventricular mass (RVM) and atrial mass (RAM) could be determined.

### ***Data Collection and Analysis***

Cardiac output was measured using a model T206 small animal blood flow meter in conjunction with a pre-calibrated in-line flow probe (2N, Transonic Systems Inc. Ithaca, NY). A Gould Statham pressure transducer (Model P23 ID, Oxnard, CA) was used to measure  $P_{\text{OUT}}$ , and  $P_{\text{IN}}$  was measured using a Grass pressure transducer (Model PT300, Warwick, RI, USA). Before the start of each experiment, the pressure transducers were calibrated against a static column of water, where zero pressure (0 cm  $H_2O$ ) was set at the saline level in the experimental bath (note: 1 cm  $H_2O$  = 0.098 kPa). Pressure and flow signals were collected at 20 Hz, and amplified and filtered using a Model MP100A-CE data acquisition system (BIOPAC Systems Inc., Santa Barbara, CA). The acquired signals were then analysed and stored using Acknowledge 3.7 Software (BIOPAC Systems Inc., Santa Barbara, CA). Analysis included using pre-determined calibrations (Faust et al., 2004) to adjust  $P_{\text{IN}}$  and  $P_{\text{OUT}}$  to account for the resistance in the tubing between the points of pressure measurement and the heart.

Cardiovascular performance was continuously measured throughout the experiment by measuring cardiac output ( $Q$ ),  $P_{\text{IN}}$ , and  $P_{\text{OUT}}$ .  $P_{\text{IN}}$  was measured before each  $Q_{\max}$  test in order to determine the input pressure required to obtain resting  $Q$ . Cardiac output, heart rate ( $f_H$ ), stroke volume, ( $S_V$ ) and  $P_{\text{IN}}$  were also measured/calculated at each step of the  $Q_{\max}$  and  $PO_{\max}$  tests. Heart rate was calculated by measuring the number of systolic peaks during a 30 second interval. Cardiac output ( $\text{mL min}^{-1} \text{ kg}^{-1}$ ) and stroke volume ( $\text{mL kg}^{-1}$ ) were calculated as:

$$\text{Cardiac output (Q, mL min}^{-1} \text{ kg}^{-1}) = \text{cardiac output (mL min}^{-1}) / \text{fish mass (kg)}$$

194 Stroke volume ( $\text{mL kg}^{-1}$ ) =  $(Q / f_H) / \text{fish mass (kg)}$

195

196 and myocardial power output ( $\text{PO}$ ,  $\text{mW g}^{-1}$  ventricle) was calculated as :

197

198  $(Q \times (P_{\text{OUT}} - P_{\text{IN}}) \times a) / \text{ventricular mass.}$

199

200 Where  $P_{\text{OUT}}$  and  $P_{\text{IN}}$  are output and input pressures ( $\text{cm H}_2\text{O}$ ) respectively, and  $a = 0.0016$   
201  $\text{mW min mL}^{-1} \text{cm H}_2\text{O}^{-1}$  is a conversion factor to  $\text{mW}$ .

202

203 Statistical analysis was performed using SigmaStat 3.5 (Systat Software Inc., Chicago,  
204 USA). Two-way repeated measures ANOVAs were used to test for the effects of temperature  
205 and adrenaline concentration, and Holm-Sidak post-hoc tests were then used to examine  
206 differences between groups when main effects were significant ( $p < 0.05$ ). Values in the text,  
207 and presented in figures and tables, are means  $\pm 1$  s.e.m..

208

209

## 210 **RESULTS**

211 Acclimation temperature had no significant effect on cod ventricular or atrial mass, or  
212 relative ventricular or atrial mass [ $\text{RVM} = 0.080 - 0.091$  and  $\text{RAM} = 0.023 - 0.026$ ] (Table  
213 1).

214

### 215 *Effects of Temperature*

#### 216 *Cardiac Performance at Rest*

217 Under resting conditions, with 5 nM AD,  $10^\circ\text{C}$  hearts (when acclimated to this  
218 temperature or acutely exposed to it) required a slightly positive  $P_{\text{IN}}$  ( $0.004 \pm 0.02$  kPa) to  
219 maintain the required resting  $Q$  of  $\sim 16 \text{ mL min}^{-1} \text{kg}^{-1}$  (Table 2). This value was  $\sim 0.03$  to  $0.08$   
220 kPa higher than the negative input pressures required by  $4^\circ\text{C}$  hearts (again when acclimated or  
221 acutely challenged) to maintain resting  $Q$  or of the  $0^\circ\text{C}$  acclimated hearts tested at this  
222 temperature (these hearts requiring the lowest input pressure,  $-0.11$  kPa). Both  $Q$  and  $\text{PO}$   
223 were significantly higher at  $10^\circ\text{C}$  than at  $4$  or  $0^\circ\text{C}$ , and at  $4^\circ\text{C}$  vs.  $0^\circ\text{C}$  due to our manipulation  
224 of  $Q$  to reflect *in vivo* values at these different temperatures. These differences in  $Q$  were  
225 mirrored primarily by resting values for  $f_H$ , ( $41.4$  at  $10^\circ\text{C}$ ,  $33.2$  at  $4^\circ\text{C}$ , and  $24.9$  at  $0^\circ\text{C}$ ) as  $S_V$   
226 was not significantly different between the groups (range  $0.33 - 0.4 \text{ mL kg}^{-1}$ ).

227

# *Maximum Cardiac Performance*

Acclimation temperature also had a significant effect on heart rate during the  $Q_{\max}$  test, with heart rate falling from  $\sim 40.5$  to  $29.1$  beats  $\text{min}^{-1}$  between  $10$  and  $0^{\circ}\text{C}$  (Figure 2A).  $Q_{\max}$  decreased significantly with acclimation temperature (from approx.  $44$  to  $34$   $\text{mL min}^{-1} \text{kg}^{-1}$ ). However, the  $Q_{10}$  values for changes in  $Q_{\max}$  with temperature were quite low ( $1.40$ ,  $1.25$  and  $1.34$  for  $10 - 4^{\circ}\text{C}$ ,  $4 - 0^{\circ}\text{C}$  and  $10 - 0^{\circ}\text{C}$ , respectively). This was because  $S_{V\max}$  increased slightly (i.e. from  $1.15$  and  $1.30$   $\text{mL kg}^{-1}$ ), although not significantly ( $p = 0.30$ ), between  $10$  and  $0^{\circ}\text{C}$  (Figure 2B). Maximum power output of  $10^{\circ}\text{C}$  acclimated hearts was  $6.7$   $\text{mW g}^{-1}$  (Figure 3). Although  $PO_{\max}$  was lower at both  $4$  ( $6.1$   $\text{mW g}^{-1}$ ) and  $0^{\circ}\text{C}$  ( $4.6$   $\text{mW g}^{-1}$ ), none of the values for  $PO_{\max}$  were significantly different ( $p = 0.12$ ).

An acute drop in temperature from  $4$  to  $0^{\circ}\text{C}$  had no effect on any of the measured maximum cardiovascular parameters, and only  $f_H$  changed significantly (decreasing by  $\sim 25\%$ ) when  $10^{\circ}\text{C}$  acclimated hearts were tested at  $4$  as compared to  $10^{\circ}\text{C}$  (Figures 2 and 3). In contrast, the maximum performance of hearts from  $4^{\circ}\text{C}$  acclimated cod increased dramatically when tested at  $10^{\circ}\text{C}$ . Heart rate was  $40\%$  higher,  $Q_{\max}$  and  $PO_{\max}$  increased by  $65\%$  (to  $61$   $\text{mL min}^{-1} \text{kg}^{-1}$ ) and  $80\%$  (to  $10.9$   $\text{mW g}^{-1}$ ), respectively, and this substantial enhancement in pumping capacity resulted in both of these latter parameters being significantly higher (by  $37$  and  $50\%$ , respectively) as compared with hearts from  $10^{\circ}\text{C}$  acclimated fish when tested at  $10^{\circ}\text{C}$ . Interestingly, these increases in maximum pumping capacity were not associated with statistically significant changes in  $S_V$  (although mean  $S_V$  was  $25\%$  higher in  $4^{\circ}\text{C}$  acclimated fish; see Figure 2B), or in the shape or position of the relationships between  $PO$  or  $Q$  and  $P_{\text{out}}$  (Figure 4). Maximum values for power output were recorded between  $5$  and  $6$   $\text{kPa}$  of diastolic pressure, and  $Q$  values for hearts from  $4^{\circ}\text{C}$  acclimated cod tested at  $10^{\circ}\text{C}$  were substantially higher as compared to all other groups at all values of  $P_{\text{out}}$ .

# *Adrenergic Effects*

Increasing the adrenaline concentration from  $5$  to  $200$   $\text{nM}$  generally had a positive inotropic effect on hearts tested under ‘resting’ levels of performance at  $10$  and  $4^{\circ}\text{C}$ , with  $Q$ ,  $S_V$  and  $PO$  significantly or noticeably increased by  $\sim 10 - 20\%$  at the higher concentration. However, no such stimulatory effect of the high adrenaline dose was observed in hearts tested at  $0^{\circ}\text{C}$ . (Table 2), and  $f_H$  was unaffected by the  $200$   $\text{nM}$  AD dose at any temperature. A marginally positive effect of  $200$   $\text{nM}$  AD on heart function was also observed when comparing maximum cardiac performance ( $Q_{\max}$ ,  $S_{V\max}$ ,  $PO_{\max}$ ) using the overall model ( $p$  values =  $0.009$ ,  $0.03$  and  $0.05$ , respectively)(see Figures 2 and 3). However, post-hoc Holm-



Sidak t-tests did not reveal any significant effects of increased (200 vs. 5 nM) adrenaline on maximum cardiac parameters between groups at any of the acclimation/test-temperature combinations.

# DISCUSSION

The  $f_H$  of *in situ* hearts from 10°C acclimated cod was 41 beats min<sup>-1</sup> at 10°C, and maximum Q and  $S_V$  were 44 mL min<sup>-1</sup> kg<sup>-1</sup> and 1.14 mL kg<sup>-1</sup>, respectively. This heart rate is substantially higher than measured *in vivo* at 10°C after extended (1 week) recovery from surgery (28 beats min<sup>-1</sup>; Webber et al., 1998). However, this difference was not unexpected given that the cholinergic tonus (37%) on the cod heart at 10°C is greater than the adrenergic tonus (21%) (Axelsson et al., 1998), and all nervous tone is eliminated in the *in situ* heart preparation. The reported  $Q_{max}$  and  $S_{Vmax}$  also correspond well with *in vivo* data for this species. Petersen and Gamperl (2010) reported values for  $Q_{max}$  and  $S_{Vmax}$  of 44.5 mL min<sup>-1</sup> kg<sup>-1</sup> and 0.99 mL kg<sup>-1</sup> in cod swum to their critical swimming speed (1.50 bl s<sup>-1</sup>) at 10°C, while cod swum at 0.7 m s<sup>-1</sup> had a Q of 35 mL min<sup>-1</sup> kg<sup>-1</sup> (Webber et al., 1998). The close association between *in situ* and *in vivo* cardiac function in this species, is very similar to that for the rainbow trout (Claireaux et al., 2005), and further validates this preparation for studies of cardiac function in fishes.

## Temperature Effects on Cardiac Function

Cardiac hypertrophy is often associated with cold-acclimation/adaptation (Driedzic et al., 1996; Farrell, 1996; Axelsson et al., 1998; Aho and Vornanen, 2001), and has been previously reported to occur in Atlantic cod. Foster et al. (1993) showed that the RVM of juvenile cod acclimated to 5°C for 43 days was 24% greater than for 15°C acclimated fish. This latter result differs from this study where no difference in RVM was found between cod acclimated to temperatures between 0 and 10°C (Table 1). This discrepancy may be due to the age of the fish used in the 2 studies (juvenile vs. adult), or the range of acclimation temperatures utilized (0 - 10°C vs. 5 and 15°C). Nonetheless, this is not the first study to report that RVM does not increase with cold acclimation. Heart size did not change in the white bass (*Morone americana*) or yellow perch (*Perca flavescens*) when exposed to cold temperatures (Sephton and Driedzic, 1991). Although many studies report that RVM increases in rainbow trout at cold temperatures (e.g. Farrell et al., 1988; Graham and Farrell, 1989), Sephton and Driedzic (1995) did not observe any increase in heart size when trout were acclimated to 5°C for 4 weeks.

296 A clear effect of acclimation temperature was seen on intrinsic heart rate at rest, with  
 297  $Q_{10}$ s of 1.44, 2.05 and 1.66 between 10 and 4°C, 4 and 0°C and 10 and 0°C, respectively.  
 298 These results suggest that there was partial compensation of  $f_H$  between 10 and 4°C, but not as  
 299 temperature fell further. The effect of acclimation temperature on  $f_H$  of the *in situ* cod heart is  
 300 consistent with data for the rainbow trout and sea raven (*Hemitripterus americanus*). The  $Q_{10}$   
 301 value for trout hearts acclimated to 15 and 5°C and perfused with 5 nM adrenaline was 1.32  
 302 (Graham and Farrell, 1989), whereas sea raven hearts tested at 12 - 14°C vs. 2 - 3°C had a  $Q_{10}$   
 303 for  $f_H$  of ~ 1.81 (Graham and Farrell, 1985). Collectively, these results suggest that the  
 304 acclimation/acclimatization capacity of pacemaker cells and/or mechanisms that determine  
 305 the kinetics of myocardial contraction are limited in temperate teleosts at temperatures near  
 306 their lower thermal limit.

307 While acclimation temperature had a substantial effect on resting  $f_H$ , its influence on  
 308  $Q_{max}$  and  $PO_{max}$  was not as great.  $Q_{max}$  was not different between 10 and 4°C and only fell by  
 309 8.5% between 4 and 0°C ( $Q_{10}$  value 1.25), and acclimation temperature had no significant  
 310 effect on  $PO_{max}$  (Figures 2 and 3). Further, cardiac scope showed a slight positive  
 311 compensation between 4 and 0°C ( $Q_{10} = 1.7$ ), and full, if not a slight over compensation  
 312 between 10 and 4°C ( $Q_{10} = 0.9$ )(Figure 5). The ability of the Atlantic cod heart to largely  
 313 compensate for the effects of temperature on  $Q_{max}$  and  $PO_{max}$  was due to the heart's ability to  
 314 maintain, or slightly increase,  $S_{Vmax}$  at the two colder acclimation temperatures (Figure 2B).  
 315 These results suggest that acclimation to cold temperatures does not have a negative impact  
 316 on the intrinsic mechanical properties of the cod myocardium. This finding is in contrast to  
 317 studies on most other teleosts. Sea raven acclimated to 2-3°C had a maximum stroke volume  
 318 20% lower than measured in fish acclimated to 12-14°C (Graham and Farrell, 1985). When  
 319 the increase in ventricular mass in 5 vs. 15°C acclimated rainbow trout is taken into account,  
 320  $S_{Vmax}$  (in mL g ventricle) was approximately 50% lower in fish acclimated to the lower  
 321 temperature (Graham and Farrell, 1989). Finally, the pumping capacity of hearts from 5°C  
 322 acclimated carp (*Carassius carassius*) was only approx. one-third of that observed at 15°C  
 323 (Matikainen and Vornanen, 1992).

324 Further evidence that the cod heart is well adapted to, and has considerable capacity  
 325 for thermal compensation at, cold temperatures comes from the acute temperature change  
 326 experiments: 1) both groups of hearts that experienced drops in temperature (from 10 to 4°C  
 327 and 4 to 0°C) had values of  $Q_{max}$  and  $PO_{max}$  that were equivalent to, or slightly higher, than  
 328 measured in hearts acclimated to the lower temperature; and 2) hearts acclimated at 4°C, but  
 329 tested at 10°C, had values for these two variables that far exceeded (by 37 and 50%,

respectively) those measured in hearts from 10°C acclimated fish (Figures 2 and 3). Indeed, both these results are remarkable based on data for the majority of teleost species examined under similar experimental conditions. For example, *in situ*  $Q_{\max}$  and  $PO_{\max}$  were approximately 40 - 45% lower when hearts from summer acclimated (12-14°C) sea raven were tested at 3.3°C, and 20 and 35% lower, respectively, in winter acclimated (2-3°C) than summer acclimated fish when tested at 13°C (Graham and Farrell, 1985). The maximum contractile force developed by the hearts of 4°C acclimated rainbow trout was reduced by 60% when acutely exposed to 10°C without adrenaline, and 20% lower even when 100 nM of adrenaline was added (Aho and Vornanen, 2001). The maximum isometric tension and pumping capacity of the burbot (*Lota Lota*, another member of the family Gadidae) heart are maximum when acclimated to 1°C, but decrease precipitously when exposed to an acute increase in temperature (Tiitu and Vornanen, 2002). Finally, even in winter active freshwater species (e.g. yellow perch; smallmouth bass, *Micropterus dolomieu*) where positive thermal compensation in contractile force has been reported, this effect is only seen at low contraction/pacing frequencies ( $< 30 \text{ min}^{-1}$ ) (Bailey and Driedzic, 1990). In the present study, hearts from 4°C acclimated cod were able to maintain or increase  $S_{V\max}$  as compared with 10°C acclimated fish even though their intrinsic  $f_H$  at 10°C exceeded  $45 \text{ beats min}^{-1}$  (see Figure 2B). It is unlikely, however, that the cod heart's ability to pump at, or near, maximal levels when chronically or acutely exposed to temperatures at the lower end of its thermal range is unique amongst temperate marine teleosts. Axelsson et al. (unpublished; see Figure 6.4 in Axelsson, 2005) showed that cardiac scope of the eurythermal sculpin (*Myoxocephalus scorpius*) exposed to an acute temperature increase from 1 to 10°C is 1.6 fold that measured in fish held at 1°C.

The ability of the cod heart to largely compensate for chronic and acute decreases in temperature, and to elevate performance when exposed to an acute increase in temperature from 4 to 10°C, must be predicated on aspects of cardiac and myocardial physiology. In this study, we did not investigate how cellular and molecular mechanisms important in myocardial plasticity and performance were affected by the imposed temperature regimes. However, we speculate that considerable remodelling of both the mechanical and electrical properties of the cod heart is probably involved in its superior cold performance. These alterations could include a prolonged action potential (Haivrenen and Vornanen, 2008; Galli et al., 2009), and an enhancement of sarcolemmal  $\text{Na}^+$  current ( $I_{\text{Na}}$ ) that augments  $\text{Ca}^{2+}$  influx through  $\text{Na}^+/\text{Ca}^{2+}$  exchange (Havirenen and Vornanen, 2004). Further, the cod heart is rare amongst teleosts in that the force-frequency relationship is flat or positive over the range of  $f_H$  measured in this

study, and this phenomenon can be eliminated by ryanodine (see Figure 7D in Driedzic and Gesser, 1988). This latter data suggests that aspects of SR function may play a major role in enabling the *in situ* cod heart to maintain performance over a range of temperatures and to elevate performance when exposed to an acute increase in temperature. Indeed, this hypothesis has significant support in the literature. Several studies have shown that SR function is augmented in cold acclimated or living species, and that SR  $\text{Ca}^{2+}$  cycling offers a mechanism for thermal plasticity in fish hearts (Aho and Vornanen, 1998, Aho and Vornanen 1999; Shiels et al., 2006; Shiels et al., 2011). Tiitu and Vornanen (2002) reported that excitation coupling of burbot hearts was more dependent on SR function after an acute temperature increase to 7°C than it was at the 1°C acclimation temperature.

Our data for cod *in situ* cardiac function suggest that this species should be able to maintain its performance capacity at cold temperatures, and when it encounters marked seasonal or diel temperature variations (e.g. see D'Amours, 1993; Godø and Michalson, 2000, Righton et al., 2010). However, this conclusion is in contrast to that reported for the effects of temperature on cod swimming and metabolic performance. Sylvestre et al. (2007) reported that cod swimming performance and metabolic capacity were reduced significantly (by 20–25%) following a short-term (over 2 day) drop in temperature from 7 to 3°C. Lurman et al. (2009) found that acclimation temperature (4 vs. 10°C) had no or minimal effects on the active (maximum) metabolic rate and critical swimming speed of cod when tested at either temperature, but that these variables were significantly (10 – 20%) lower in both groups when tested at the other temperature. Finally, although cardiac scope changed little (i.e. by < 20%) when our cod were acclimated to temperatures of 0, 4, and 10°C (present study), Claireaux et al. (2000) showed that metabolic scope of the Atlantic cod decreased by 28% between 10 and 5°C and a further 48% between 5 and 2°C (Figure 5). The large discrepancy between the effects of temperature on cod cardiac vs. aerobic scope is an unexpected finding given the excellent relationship between cardiac output and oxygen consumption reported for Atlantic cod (e.g. Webber et al., 1998; Gollock et al., 2006), and suggests that there may be situations, particularly large acute changes in temperature and cold temperatures, where the relationship between cardiac function and oxygen consumption breaks down and the capacity of fishes to utilize oxygen becomes the limiting factor. However, these results will need to be confirmed *in vivo* as the influence of temperature changes on extrinsic mechanisms that control/influence fish cardiac function are precluded when using *in situ* heart preparations.

## Cardiac Function and Adrenergic Stimulation

In this study, we showed that high levels of adrenaline had minimal effects on the resting or maximum *in situ* performance of the Atlantic cod heart (e.g. see Figs. 2 and 3). This result was not because the basal level of AD (5 nM) resulted in near maximal cardiac stimulation or that the maximum level chosen (200 nM) was not physiological. A pilot study conducted with three cod hearts at 10°C compared the effects of no AD with both 5 and 200 nM AD and showed little difference in performance between them (data not shown), and Gamperl and Genge (unpublished data) found no observable differences in resting or maximum  $f_H$ ,  $Q$ , or  $S_V$  in cod hearts treated with 7 nM adrenaline vs. those perfused with adrenaline-free saline. Further, *in vivo* maximum post-stress plasma AD concentrations in the range of 100- 300 nM have been reported for this species (Wahlqvist and Nilsson, 1980; Alzaid, 2012). Instead, in agreement with Axelsson (1988), our results indicate that even maximum circulating catecholamine levels have little inotropic or chronotropic effect on the cod heart. This data is in sharp contrast to data on many teleosts, including salmonids, the eel (*Anguilla dieffenbachia*) and tunas where this hormone causes large increases in the heart's pumping capacity and in myocardial force development (Graham and Farrell, 1989; Franklin and Davie, 1992; Gamperl et al., 1994; Shiels et al., 2003; Galli et al., 2009). However, the cod does not appear to be unique in having a very limited capacity to elevate cardiac performance in response to increases in circulating catecholamines. For example, Mendonca and Gamperl (2009) showed that the winter flounder heart is not dependent upon adrenergic stimulation at rest, and only report increases of 6% in  $S_V$  and 10% in  $Q$  following the simultaneous injection of 0.2 and 0.4  $\mu\text{g kg}^{-1}$  of epinephrine and norepinephrine at 8°C, respectively. Maximum adrenergic stimulation (up to 500 nM) has no effect on either heart rate or maximum  $Q$ , and only a modest (10 – 15%) positive inotropic effect on power output of the *in situ* sea bass (*Dicentrarchus labrax* L.) heart at 18 and 22°C (Farrell et al., 2007). Finally, Lague et al. (2012) report that adrenaline and noradrenaline concentrations as high as  $5 \times 10^{-6}$  M have no effect on function of the 22°C *in situ* tilapia (*Oreochromis hybrid*) heart under conditions of normoxia, hypoxia or acidosis.

While this study did not investigate the mechanistic basis(es) behind the diminished sensitivity of cod heart function to adrenergic stimulation, there are several potential explanations. First,  $B_3$ -adrenoreceptors exist in the fish heart (Nikinmaa, 2003; Nickerson et al., 2003; Imbrogno et al., 2006) and may play a “protective role” in some fish hearts (including the cod) by preventing excessive  $\beta_1/\beta_2$ -stimulation of the myocardium (Gauthier et al., 2007; Angelone et al., 2008). Second, catecholamine induced SL  $\text{Ca}^{2+}$  influx varies

between species, and may be somewhat independent of SL  $\text{Ca}^{2+}$  channel density. For example, Vornanen (1998) showed that isoproterenol increased basal  $\text{Ca}^{2+}$  current ( $I_{\text{Ca}}$ ) by approximately 2.3-fold in trout myocytes but only 1.4-fold in crucian carp (*Carassius carassius*) cardiac cells, despite the fact that there is a higher density of myocardial  $\text{Ca}^{2+}$  channels in the latter species. Alternatively, Shiels et al. (2006) suggest that  $\text{Na}^+$  -  $\text{Ca}^{2+}$  exchange may be the primary pathway for SL  $\text{Ca}^{2+}$  influx in the cold stenothermal burbot. If a similar phenomenon operates at cold temperatures in the cod heart, this would largely preclude an inotropic response to adrenergic stimulation. Third, changes in cod cardiac function are much more dependent on alterations in cholinergic than adrenergic tonus (Axelsson, 1988; Altimiras et al., 1997), and several authors (Laurent et al., 1983; Axelsson and Nilsson, 1986; Fritsche and Nilsson, 1990; Altimiras et al., 1997) suggest that the teleost heart is also controlled by a non-adrenergic non-cholinergic (NANC) tonus which could be more important in the cod heart than in other teleosts. For instance, although NO (nitric oxide) generally results in negative chronotropy and inotropy, NO has also been identified as an important NANC regulator of cardiac performance in teleosts (Imbrogno et al., 2001; Tota et al., 2005). This raises the possibility that the cod heart has a diminished adrenergic sensitivity to catecholamines because other systems play a predominant role in controlling cardiac function.

Although our results show that adrenaline has very limited direct effects on the cod heart, this does not preclude this hormone from having a significant role in supporting cardiac function. In rainbow trout, adrenaline increases venous tone through an  $\alpha$ -adrenergic dependent mechanism and decreases venous compliance (Sandblom and Axelsson, 2006; Zhang et al., 1998), and Sandblom et al. (2005) showed that increases in mean circulatory filling pressure, central venous pressure and Q were abolished in swimming sea bass after  $\alpha$ -adrenoceptor blockade. These results suggest that  $\alpha$ -adrenergic stimulation of the cod's venous vasculature could mobilize venous blood, and increase cardiac preload/ $S_v$ .

# Conclusions

In this study, we show that the isolated adult cod heart can maintain its pumping capacity when challenged with acute temperature decreases, and that maximum cardiac function is only reduced slightly when this species is acclimated to temperatures as low as 0°C. This degree of thermal-independence when faced with decreasing temperatures has not been reported previously for fish cardiac function, and is likely to be of considerable benefit to this fish which can be exposed to subzero winter temperatures and to significant

temperature changes during diel vertical migrations (Righton et al., 2010). What mechanisms mediate this plasticity in cardiac function are not known, but it is evident that: 1) alterations in adrenergic sensitivity and heart size are not involved; and 2) the capacity for modifications in myocardial excitability and contractility with temperature acclimation must be considerable given the large increases in  $Q_{\max}$  and  $PO_{\max}$  exhibited by hearts from 4°C acclimated fish when tested at 10°C.

# **ACKNOWLEDGEMENTS**

We thank Danny Boyce and the Atlantic Innovation Fund (AIF-ACOA) for providing the fish, the technical staff of the Ocean Sciences Centre for maintaining/repairing the temperature control equipment used in these studies, and Dr. Holly Shields for helpful discussions on cellular processes mediating cardiac functional plasticity.

# **FUNDING**

This research was funded by a Natural Sciences and Engineering Research Council of Canada (NSERC) Discovery grant to AKG, by funds provided to GJL by the German Academic Exchange Service (DAAD) and the Society for Experimental Biologists (SEB), and a Memorial University graduate Fellowship to LHR.



500 **LIST OF SYMBOLS AND ABBREVIATIONS**

501

|     |                   |                                           |
|-----|-------------------|-------------------------------------------|
| 502 | AD                | adrenaline                                |
| 503 | AR                | adrenoreceptors                           |
| 504 | ARDF              | Aquaculture Research Development Facility |
| 505 | bl                | body lengths                              |
| 506 | B <sub>max</sub>  | β-adrenoreceptor density                  |
| 507 | bpm               | beats per minute                          |
| 508 | Cyclic AMP        | cyclic adenosine monophosphate            |
| 509 | $f_H$             | heart rate                                |
| 510 | Hz                | hertz                                     |
| 511 | I <sub>Ca</sub>   | calcium ion current                       |
| 512 | I <sub>Na</sub>   | sodium ion current                        |
| 513 | K <sub>d</sub>    | dissociation constant                     |
| 514 | kPa               | kilopascal                                |
| 515 | NANC              | non-adrenergic non-cholinergic            |
| 516 | NO                | nitric oxide                              |
| 517 | P <sub>IN</sub>   | input pressure                            |
| 518 | PO                | power output                              |
| 519 | PO <sub>max</sub> | maximum power output                      |
| 520 | P <sub>OUT</sub>  | output pressure                           |
| 521 | Q                 | cardiac output                            |
| 522 | Q <sub>10</sub>   | temperature quotient                      |
| 523 | Q <sub>max</sub>  | maximum cardiac output                    |
| 524 | RAM               | relative atrial mass                      |
| 525 | RVM               | relative ventricular mass                 |
| 526 | s.e.m.            | standard error of the mean                |
| 527 | SL                | sarcolemma                                |
| 528 | SR                | sarcoplasmic reticulum                    |
| 529 | S <sub>v</sub>    | stroke volume                             |

530

531

532

533



## 534 REFERENCES

- 535 **Aho, E. and Vornanen, M.** (1998).  $\text{Ca}^{2+}$ -ATPase activity and  $\text{Ca}^{2+}$  uptake by sarcoplasmic  
536 reticulum in fish heart: effects of thermal acclimation. *J. Exp. Biol.* **201**, 525 -532.
- 537 **Aho, E. and Vornanen, M.** (1999). Contractile properties of atrial and ventricular  
538 myocardium of the heart of rainbow trout (*Oncorhynchus mykiss*): effects of thermal  
539 acclimation. *J. Exp. Biol.* **202**, 2663 -2677.
- 540 **Aho, E. and Vornanen, M.** (2001). Cold-acclimation increases basal heart rate but decreases  
541 its thermal tolerance in rainbow trout (*Oncorhynchus mykiss*). *J. Comp. Physiol. B* **171**, 173 -  
542 179.
- 543 **Angelone, T., Filice, E., Quintieri, A.M., Imbrogno, S., Recchia, A., Pulera` , E.,**  
544 **Mannarino, C., Pellegrino, D. and Cerra, M.C.** (2008).  $\beta_3$ -Adrenoceptors modulate left  
545 ventricular relaxation in the rat heart via the NO-cGMP-PKG pathway. *Acta Physiol.* **192**: 1-  
546 11.
- 547  
548 **Altimiras, J., Aissaoui, A., Tort, L., and Axelsson, M.** (1997). Cholinergic and adrenergic  
549 tones in the control of heart rate in teleosts. How should they be calculated? *Comp. Biochem.*  
550 *Physiol.* **118A**: 131-39.
- 551  
552 **Alzaid, A.** (2012). Stress-Related and Ontogenetic Aspects of Metabolic Depression in  
553 Cunner (*Tautoglabrus adspersus*). M.Sc. Thesis. Memorial University of Newfoundland. 90  
554 pp.
- 555  
556 **Axelsson, M.** (1988). The importance of nervous and humoral mechanisms in the control of  
557 cardiac performance in the Atlantic cod *Gadus morhua* at rest and during non-exhaustive  
558 exercise. *J. Exp. Biol.* **137**, 287-301.
- 559 **Axelsson, M.** (2005). The circulatory system and its control. In *Fish Physiology*, Volume 22  
560 (Eds. Farrell, A.P. and Steffensen, J.F.) pp. 239-280: Academic Press.
- 561 **Axelsson, M. and Nilsson, S.** (1986). Blood pressure control during exercise in the Atlantic  
562 cod, *Gadus morhua*. *J. Exp. Biol.* **126**, 225-236.

563

- 564 **Axelsson, M., Agnisola, C., Nilsson, S. and Tota, B.** (1998). Fish cardio-circulatory function  
565 in the cold. In *Cold Ocean Physiology*, (Eds. H.-O. Pörtner and R. C. Playle), pp. 327-364.  
566 Cambridge: Cambridge University Press.
- 567 **Bailey, J.R. and Driedzic, W.R.** (1990). Enhanced maximum frequency and force  
568 development of fish hearts following temperature acclimation. *J. Exp. Biol.* **149**: 239 – 254.
- 569 **Beitinger, T. L., Bennett, W. A. and McCauley, R. W.** (2000). Temperature tolerance of  
570 North American freshwater fishes exposed to dynamic changes in temperature. *Environmental*  
571 *Biology of Fishes* **58**, 237-275.
- 572 **Brett, J. R.** (1971). Energetic responses of salmon to temperature. A study of some thermal  
573 relations in the physiology and freshwater ecology of sockeye salmon (*Oncorhynchus nerka*).  
574 *Amer. Zool.* **11**, 99-113.
- 575 **Claireaux, G., Webber, D. M., Lagardère, J.-P. and Kerr, S. R.** (2000). Influence of water  
576 temperature and oxygenation on the aerobic metabolic scope of Atlantic cod (*Gadus morhua*).  
577 *J. Sea Res.* **44**, 257-265.
- 578 **Claireaux, G., McKenzie, D. J., Genge, A. G., Chatelier, A., Aubin, J. and Farrell, A. P.**  
579 (2005). Linking swimming performance, cardiac pumping ability and cardiac anatomy in  
580 rainbow trout. *J. Exp. Biol.* **208**, 1775-1784.
- 581 **Clark, D. S. and Green, J. M.** (1991). Seasonal variation in temperature preference of  
582 juvenile Atlantic cod (*Gadus morhua*), with evidence supporting an energetic basis of diel  
583 vertical migration. *Can. J. Zool.* **69**, 1302-1307.
- 584 **D'Amours, D.** (1993). The distribution of cod (*Gadus morhua*) in relation to temperature  
585 and oxygen level in the Gulf of St. Lawrence. *Fish. Oceanogr.* **2**, 24-29.
- 586 **Driedzic, W.R. and Gesser, H.** (1988). Differences in force-frequency relationships and  
587 calcium dependency between elasmobranch and teleost hearts. *J. Exp. Biol.* **140**, 227 – 241.
- 588 **Driedzic, W. R., Bailey, J. R. and Sephton, D. H.** (1996). Cardiac adaptations to low  
589 temperature in non-polar teleost fish. *J. Exp. Zool.* **275**, 186-195.
- 590 **Eliason, E.J., Clark, T.D., Hague, M.J., Hanson, L.M., Gallagher, Z.S., Jeffries, K.M.,**  
591 **Gale, M.K., Patterson, D.A., Hinch, S.G. and Farrell, A.P.** (2011). Differences in thermal  
592 tolerance among sockeye salmon populations. *Science*. **332**: 109-112.

- 593 **Farrell, A. P.** (1996). Effects of temperature on cardiovascular performance. In *Global*  
 594 *Warming: Implications of Freshwater and Marine Fish*, (Eds. C. M. Wood and D. G.  
 595 McDonald), pp. 135-158. Cambridge: Cambridge University Press.
- 596
- 597 **Farrell, A.P.** (2009). Environment, antecedents and climate change: lessons from the study  
 598 of temperature physiology and river migration of salmonids. *J. Exp. Biol.* **212**, 3771-3780.
- 599 **Farrell AP, MacLeod K, and Driedzic WR.** (1982). The effects of preload, after load, and  
 600 epinephrine on cardiac performance in the sea raven, *Hemitripterus americanus*. *Can. J. Zool.*  
 601 **60**, 3165–3171.
- 602
- 603 **Farrell, A.P., MacLeod, K.R. and Chancey, B.** (1986). Intrinsic mechanical properties of  
 604 the perfused rainbow trout heart and the effects of catecholamines and extracellular calcium  
 605 under control and acidotic conditions. *J. Exp. Biol.* **125**, 319-345.
- 606
- 607 **Farrell, A. P., Hammons, A. M., Graham, M. S. and Tibbits, G. F.** (1988). Cardiac growth  
 608 in rainbow trout, *Salmo gairdneri*. *Can. J. Zool.* **66**, 2368- 2373.
- 609
- 610 **Farrell, A. P., Axelsson, M., Altimiras, J., Sandblom, E. and Claireaux, G.** (2007).  
 611 Maximum cardiac performance and adrenergic sensitivity of the sea bass *Dicentrarchus*  
 612 *labrax* at high temperatures. *J. Exp. Biol.* **210**, 1216-1224.
- 613 **Faust, H.A., Gamperl, A.K. and Rodnick, K.J.** (2004). All trout are not created equal:  
 614 intraspecific variation in cardiac hypoxia tolerance. *J. Exp. Biol.* **207**, 1005-1015.
- 615 **Foster, A. R., Hall, S. J. and Houlihan, D. F.** (1993). The effects of temperature acclimation  
 616 on organ/tissue mass and cytochrome c oxidase activity in juvenile cod (*Gadus morhua*). *J.*  
 617 *Fish Biol.* **42**, 947-957.
- 618 **Franklin, C.E. and Davie, P. S.** (1992). Myocardial power output of an isolated eel  
 619 (*Anguilla dieffenbachii*) heart preparation in response to adrenaline. *Comp. Biochem. Physiol.*  
 620 **101**, 293-298.
- 621 **Franklin, C. E., Davison, W. and Seebacher, F.** (2007). Antarctic fish can compensate for  
 622 rising temperatures: thermal acclimation of cardiac performance in *Pagothenia borchgrevinki*.  
 623 *J. Exp. Biol.* **210**, 3068-3074.

624 **Fritsche, R. and Nilsson, S.** (1990). Autonomic nervous control of blood pressure and heart  
625 rate during hypoxia in the cod, *Gadus morhua*. *J. Comp. Physiol. B* **160**, 287-292.  
626

627 **Fry, F. E.** (1971). The effect of environmental factors on the physiology of fish. In *Fish*  
628 *Physiology, Environmental Relations and Behaviour*, Vol. VI (Eds. W. S. Hoar and D. J.  
629 Randall), pp. 1-98. New York: Academic Press Inc.  
630

631 **Gamperl, A.K., Pinder, A.W., Grant, R.R. and Boutilier, R.G.** (1994). Influence of  
632 hypoxia and adrenaline administration on coronary blood flow and cardiac performance in  
633 seawater rainbow trout (*Oncorhynchus mykiss*). *J. Exp. Biol.* **193**, 209 - 232.  
634

635 **Galli, G.L.J., Shiels, H.A. and Brill, R.W.** (2009). Temperature sensitivity of cardiac  
636 function in pelagic fishes with different vertical mobilities: yellowfin tuna (*Thunnus*  
637 *albacares*), bigeye tuna (*Thunnus obesus*), mahimahi (*Coryphaena hippurus*), and swordfish  
638 (*Xiphias gladius*). *Physiol. Biochem. Physiol.* **82**, 280 – 290.  
639

640 **Gauthier, C., Sèze-Goismier, C. and Rozec, B.** (2007). Beta 3-adrenoceptors in the  
641 cardiovascular system. *Clin. Hem. Micro.* **37**, 193–204.  
642

643 **Godø, O.R. and Michalsen, K.** (2000). Migratory behavior of north-east Arctic cod, studied  
644 by use of data storage tags. *Fish. Res.* **48**, 127-140.  
645

646 **Gollock, M. J., Currie, S., Petersen, L. H. and Gamperl, A. K.** (2006). Cardiovascular and  
647 haematological responses only limit cod (*Gadhus morhua*) oxygen consumption at high  
648 temperatures. *J. Exp. Biol.* **209**, 2961-2970.

649 **Graham, M. S. and Farrell, A. P.** (1985). The seasonal intrinsic cardiac performance of a  
650 marine teleost. *J. Exp. Biol.* **118**, 173 – 183.

651 **Graham, M. S. and Farrell, A. P.** (1989). Effect of temperature acclimation on cardiac  
652 performance of a perfused trout heart. *Physiol. Zool.* **62**, 38-61.  
653

654 **Hanson, L. M., Obradovich, S., Mouniargi, J. and Farrell, A.P.** (2006). The role of  
655 adrenergic stimulation in maintaining maximum cardiac performance in rainbow trout  
656 (*Oncorhynchus mykiss*) during hypoxia, hyperkalemia and acidosis at 10°C. *J. Exp. Biol.* **209**,  
657 2442-2451.

- 658 **Haverinen, J. and Vornanen, M.** (2004). Temperature acclimation modifies Na<sup>+</sup> current in  
659 fish cardiac myocytes. *J. Exp. Biol.* **207**, 2823-2833.
- 660 **Haverinen, J. and Vornanen, M.** (2008). Responses of Action Potential and K<sup>+</sup> currents to  
661 temperature acclimation in fish hearts: phylogeny of thermal preference. *Physiol. Biochem.*  
662 *Physiol.* **82**, 468 – 482.
- 663 **Imbrogno, S., De Iuri, L., Mazza, R. and Tota, B.** (2001). Nitric oxide modulates cardiac  
664 performance in the heart of *Anguilla anguilla*. *J. Exp. Biol.* **204**, 1719-1727.
- 665  
666 **Imbrogno, S., Angelone, T., Adamo, C., Pulera`, E., Tota, B. and Cerra, M. C.** (2006).  
667 Beta3-adrenoceptor in the eel (*Anguilla anguilla*) heart: negative inotropy and NO-cGMP-  
668 dependent mechanism. *J. Exp. Biol.* **209**, 4966–4973.
- 669  
670 **Keen, J. E., Vianzon, D. M., Farrell, A. P. and Tibbits, G. F.** (1993). Thermal acclimation  
671 alters both adrenergic sensitivity and adrenoceptor density in cardiac tissue of rainbow trout.  
672 *J. Exp. Biol.* 181: 27-47.
- 673  
674 **Lague, S.L., Speers-Roesch, B., Richards, J.G., and Farrell, A.P.** (2012). Exceptional  
675 cardiac anoxia tolerance in tilapia (*Oreochromis hybrid*). *J. Exp. Biol.* **215**, 1354-1365
- 676  
677 **Laurent, P., Holmgren, S., and Nilsson, S.** (1983). Nervous and humoral control of the fish  
678 heart: structure and function. *Comp. Biochem. Physiol.* **76A**, 525-42.
- 679  
680 **Lear, W. H.** (1984). Discrimination of the stock complex of Atlantic cod (*Gadus morhua*) off  
681 southern Labrador and eastern Newfoundland, as inferred from tagging studies. *J. North. Atl.*  
682 *Fish. Sci.* **5**, 143-159.
- 683  
684 **Lurman, G.J., Bock, C.H. and Poertner, H.O.** (2009). Thermal acclimation to 4 or 10°C  
685 imparts minimal benefit on swimming performance in Atlantic cod. *J. Comp. Physiol. B.* **179**,  
686 623 – 633.
- 687 **Matikainen, N. and Vornanen, M.** (1992). Effect of season and temperature acclimation on  
688 the function of crucian carp (*Carassius carassius*) heart. *J. Exp. Biol.* **167**, 203 – 220.

- 689 **P.C. Mendonça and Gamperl, A.K.** (2009). Nervous and humoral control of cardiac  
690 performance in the winter flounder (*Pleuronectes americanus*). *J. Exp. Biol.* **212**, 934-944.
- 691 **Mendonça, P. C., Genge, A. G., Deitch, E. J. and Gamperl, A. K.** (2007). Mechanisms  
692 responsible for the enhanced pumping capacity of the in situ winter flounder heart  
693 (*Pseudopleuronectes americanus*). *Amer. J. Physiol.* **293**, R2112-R2119.
- 694 **Nickerson J.G., Dugan S.G., Drouin G., Perry S.F., and Moon T.M.** (2003). Activity of  
695 the unique  $\beta$ -adrenergic  $\text{Na}^+/\text{H}^+$  exchanger in trout erythrocytes is controlled by a novel  $\beta_3$ -  
696 AR subtype. *Am. J. Physiol.* **285**: R526–R535.
- 697
- 698 **Nikinmaa, M.** (2003).  $\text{B}_3$ -adrenergic receptors studies on rainbow trout reveal ancient  
699 evolutionary origins and functions distinct from the thermogenic response. *Am. J. Physiol.*  
700 **285**, R515-R516.
- 701
- 702 **Petersen, L.H. and Gamperl, A.K.** (2010). Effects of acute and chronic hypoxia on the  
703 swimming performance, metabolic capacity and cardiac function of Atlantic cod (*Gadus*  
704 *morhua*). *J. Exp. Biol.* **213**, 808-819.
- 705 **Pettersson, K. and Nilsson, S.** (1980). Drug induced changes in cardio-vascular parameters  
706 in Atlantic cod *Gadus morhua*. *J. Comp. Physiol.* **137**, 131-138.
- 707 **Pörtner, H.** (2001). Climate change and temperature-dependent biogeography: oxygen  
708 limitation of thermal tolerance in animals. *Naturwissenschaften* **88**, 137-146.
- 709 **Pörtner, H. O.** (2002). Climate variations and the physiological basis of temperature  
710 dependent biogeography: systemic to molecular hierarchy of thermal tolerance in animals.  
711 *Comp. Biochem. Physiol.* **132A**, 739-761.
- 712 **Pörtner, H. O.** (2010). Oxygen- and capacity-limitation of thermal tolerance: a matrix for  
713 integrating climate-related stressor effects in marine ecosystems. *J. Exp. Biol.* **213**, 881-893.
- 714 **Pörtner, H. O. and Knust, R.** (2007). Climate change affects marine fishes through the  
715 oxygen limitation of thermal tolerance. *Science* **315**, 95-97.

716  
717  
718

**Pörtner, H. O., Berdal, B., Blust, R., Brix, O., Colosimo, A., De Wachter, B., Giuliani, A., Johansen, T., Fischer, T., Knust, R. et al.** (2001). Climate induced temperature effects on growth performance, fecundity and recruitment in marine fish: developing a hypothesis for cause and effect relationships in Atlantic cod (*Gadus morhua*) and common eelpout (*Zoarces viviparus*). *Cont. Shelf Res.* **21**, 1975-1997.

**Righton, R.A., Andersen, K.H., Neat, F., Thorsteinsson, V., Steingrund, P., Svedäng, H., Michalsen, K., Hinrichsen, H-H, Bendall, V., Neuenfeldt, S., et al.** (2010). Thermal niche of Atlantic cod *Gadus morhua*: tolerance limits and optima. *Mar. Ecol. Prog. Ser.* **420**, 1-13.

**Sandblom, E., Farrell, A. P., Altimiras, J., Axelsson, M. and Claireaux, G.** (2005). Cardiac preload and venous return in swimming sea bass (*Dicentrarchus labrax* L.). *J. Exp. Biol.* **208**, 1927-1935.

**Sandblom, E. and Axelsson, M.** (2006). Adrenergic control of venous capacitance during moderate hypoxia in the rainbow trout (*Oncorhynchus mykiss*): role of neural and circulating catecholamines *Amer. J. Physiol.* **291**, R711-R718.

**Seebacher, F., Davison, W., Lowe, C. J., and Franklin, C. E.** (2005). A falsification of the thermal specialization paradigm: compensation for elevated temperatures in Antarctic fish. *Biol. Lett.* **1**, 151-154.

**Sephton, D. and Driedzic, W. R.** (1991). Effect of acute and chronic temperature transition on enzymes of cardiac metabolism in white perch (*Morone americana*), yellow perch (*Perca flavescens*) and small mouth bass (*Micropetrus dolomieu*). *Can. J. Zool.* **69**, 258-262.

**Sephton, D.H. and Driedzic, W.R.** (1995) Low temperature acclimation decreases rates of protein synthesis in rainbow trout (*Oncorhynchus mykiss*) hearts. *Fish Physiol. Biochem.* **14**, 63 – 69.

**Shiels, H. A., Vornanen, M. and Farrell, A. P.** (2003). Acute temperature change modulates the response of  $I_{Ca}$  to adrenergic stimulation in fish cardiomyocytes. *Physiol. Biochem. Zool.* **76**, 816-824.



753 **Shiels, H.A., Paajanen, V. and Vornanen, M.** (2006). Sarcolemmal ion currents and  
754 sarcoplasmic reticulum  $\text{Ca}^{2+}$  content in ventricular myocytes from the cold stenothermic fish,  
755 the burbot, *Lota lota*. *J. Exp. Biol.* **209**, 3091 – 3100.

756

757 **Shiels, H.A., Di Maio, A., Thompson, S. and Block, B.A.** (2011). Warm fish with cold  
758 hearts: thermal plasticity of excitation-contraction coupling in blue fin tuna. *Proc. R. Soc.*  
759 *Lond.* **278**, 18 – 27.

760

761 **Stillman, J. H.** (2003). Acclimation capacity underlies susceptibility to climate change.  
762 *Science* **301**, 65.

763

764 **Sokolova, I. M. and Pörtner, H. O.** (2003). Metabolic plasticity and critical temperatures for  
765 aerobic scope in a eurythermal marine invertebrate (*Littorina saxatilis*, Gastropoda:  
766 Littorinidae) from different latitudes. *J. Exp. Biol.* **206**, 195-207.

767 **Sylvestre, E-L., Lapointe, D., Dutil, J-D. and Guderley, H.** (2007). Thermal sensitivity of  
768 metabolic rates and swimming performance in two latitudinally separated populations of cod,  
769 *Gadus morhua*, L. *J. Comp. Physiol. B.* **177**, 447 – 460.

770

771 **Tiitu, V. and Vornanen, M.** (2002). Regulation of contractility in a cold stenothermal fish,  
772 the burbot *Lota lota* L. *J. Exp. Biol.* **205**, 1597 – 1606.

773

774 **Tota, B., Amelio, D., Pellegrino, D., IP., Y.K. and Cerra, M.C.** (2005). NO modulation of  
775 myocardial performance in fish hearts. *Comp. Biochem. Physiol.* **142A**: 164-177.

776

777 **Vornanen, M.** (1998) L-type  $\text{Ca}^{2+}$  current in fish cardiac myocytes: effects of thermal  
778 acclimation and  $\beta$ -adrenergic stimulation. *J. Exp. Biol.* **201**, 533-5547.

779

780 **Wahlqvist, I. and Nilsson, S.** (1980). Adrenergic control of the cardio-vascular system of the  
781 Atlantic cod, *Gadus morhua*, during "stress". *J. Comp. Physiol. B.* **137**, 145-150.

782

783 **Webber, D. M., Boutilier, R. G. and Kerr, S. R.** (1998). Cardiac output as a predictor of  
784 metabolic rate in cod *Gadus morhua*. *J. Exp. Biol.* **201**, 2779-2789.

785



786 **Zhang, Y., Weaver, L. J.R., Ibeawuchi, A. And Olson, K. R.** (1998). Catecholaminergic  
787 regulation of venous function in the rainbow trout. *Am. J. Physiol.* **274**, R1195-R1202.  
788

**Table 1:** Morphometric data for all groups used to evaluate the effect of temperature and adrenaline concentration on Atlantic cod *in situ* cardiac function. Relative ventricular (RVM) and atrial mass (RAM) are presented as a percentage of body mass. All values are mean  $\pm$  s.e.m. No significance between group differences was identified for any parameter. N = 7-10 except hearts from 4°C acclimated fish tested at 0°C where N = 4.

| Acclimation Temperature | 10                |                   | 4                 |                   |                   | 0                 |
|-------------------------|-------------------|-------------------|-------------------|-------------------|-------------------|-------------------|
| Test Temperature        | 10                | 4                 | 10                | 4                 | 0                 | 0                 |
| Mass (kg)               | 0.60 $\pm$ 0.03   | 0.54 $\pm$ 0.03   | 0.54 $\pm$ 0.03   | 0.59 $\pm$ 0.02   | 0.49 $\pm$ 0.10   | 0.56 $\pm$ 0.17   |
| Length (cm)             | 41.6 $\pm$ 0.6    | 40.5 $\pm$ 0.8    | 40.3 $\pm$ 0.5    | 40.8 $\pm$ 0.4    | 40.8 $\pm$ 1.7    | 39.9 $\pm$ 1.2    |
| Ventricle Mass (g)      | 0.49 $\pm$ 0.02   | 0.46 $\pm$ 0.03   | 0.49 $\pm$ 0.04   | 0.47 $\pm$ 0.02   | 0.40 $\pm$ 0.04   | 0.48 $\pm$ 0.03   |
| Atrial Mass (g)         | 0.154 $\pm$ 0.011 | 0.123 $\pm$ 0.008 | 0.133 $\pm$ 0.008 | 0.133 $\pm$ 0.008 | 0.123 $\pm$ 0.017 | 0.117 $\pm$ 0.006 |
| RVM (%)                 | 0.083 $\pm$ 0.014 | 0.080 $\pm$ 0.012 | 0.091 $\pm$ 0.012 | 0.083 $\pm$ 0.010 | 0.081 $\pm$ 0.009 | 0.089 $\pm$ 0.013 |
| RAM (%)                 | 0.026 $\pm$ 0.003 | 0.023 $\pm$ 0.004 | 0.025 $\pm$ 0.003 | 0.023 $\pm$ 0.002 | 0.025 $\pm$ 0.006 | 0.022 $\pm$ 0.004 |

**Table 2.** Input pressure ( $P_{IN}$ , in kPa), heart rate ( $f_H$ , in bpm), stroke volume ( $S_V$ , in mL kg<sup>-1</sup>), cardiac output ( $Q$ , in mL min<sup>-1</sup> kg<sup>-1</sup>), and power output ( $PO$ , in mW g ventricle<sup>-1</sup>) under resting conditions at 5 or 200 nM adrenaline (AD).  $Q_{10}$ s for heart rate were 1.44 between 10 and 4°C, 2.05 between 4 and 0°C and 1.66 between 10 and 0°C for hearts tested at their acclimation temperature and with 5 nM AD. Values are means  $\pm$  1 s.e.m. Values with dissimilar letters are significantly different ( $p < 0.05$ ) within a particular adrenaline concentration. An asterisk (\*) indicates a significant difference between the 5 and 200nM AD doses within each group.  $N = 7$ -10 except hearts from 4°C acclimated fish tested at 0°C where  $N = 4$ .

| Acclimation Temperature | 10                |                   |                      |                     | 4                  |                   |                      |                     |                     |                     | 0                 |                   |
|-------------------------|-------------------|-------------------|----------------------|---------------------|--------------------|-------------------|----------------------|---------------------|---------------------|---------------------|-------------------|-------------------|
| Test Temperature        | 10                |                   | 4                    |                     | 10                 |                   | 4                    |                     | 0                   |                     | 0                 |                   |
| AD                      | 5 nM              | 200 nM            | 5 nM                 | 200 nM              | 5 nM               | 200 nM            | 5 nM                 | 200 nM              | 5 nM                | 200 nM              | 5 nM              | 200 nM            |
| $P_{IN}$                | 0.004 $\pm$       | -0.008 $\pm$      | -0.036               | -0.039 $\pm$        | 0.004 $\pm$        | 0.002 $\pm$       | -0.084 $\pm$         | -0.073 $\pm$        | -0.007 $\pm$        | -0.001 $\pm$        | -0.112 $\pm$      | -0.090 $\pm$      |
|                         | 0.020             | 0.018             | $\pm$ 0.022          | 0.025               | 0.027              | 0.044             | 0.039                | 0.033               | 0.030               | 0.033               | 0.049             | 0.045             |
| $f_H$                   | 41.4 $\pm$        | 42.6 $\pm$        | 34.3 $\pm$           | 34.9 $\pm$          | 45.2 $\pm$         | 43.6 $\pm$        | 33.2 $\pm$           | 32.3 $\pm$          | 27.0 $\pm$          | 26.6 $\pm$          | 24.9 $\pm$        | 24.7 $\pm$        |
|                         | 1.0 <sup>a</sup>  | 1.5 <sup>a</sup>  | 1.5 <sup>b</sup>     | 4.1 <sup>b</sup>    | 1.3 <sup>a</sup>   | 2.6 <sup>a</sup>  | 1.5 <sup>b</sup>     | 1.2 <sup>b,c</sup>  | 2.9 <sup>c</sup>    | 1.8 <sup>c</sup>    | 0.5 <sup>c</sup>  | 1.0 <sup>c</sup>  |
| $S_V$                   | 0.40 $\pm$        | 0.42 $\pm$        | 0.32 $\pm$           | 0.37 $\pm$          | 0.34 $\pm$         | 0.41 $\pm$        | 0.31 $\pm$           | 0.39 $\pm$          | 0.34 $\pm$          | 0.35 $\pm$          | 0.33 $\pm$        | 0.36 $\pm$        |
|                         | 0.02              | 0.02              | 0.02 *               | 0.02                | 0.02 *             | 0.02              | 0.02 *               | 0.02                | 0.03                | 0.03                | 0.01              | 0.03              |
| $Q$                     | 16.3 $\pm$        | 18.0 $\pm$        | 10.8 $\pm$           | 12.9 $\pm$          | 15.6 $\pm$         | 17.5 $\pm$        | 10.2 $\pm$           | 12.5 $\pm$          | 8.8 $\pm$           | 9.1 $\pm$           | 8.3 $\pm$         | 8.9 $\pm$         |
|                         | 0.1 <sup>a</sup>  | 0.7 <sup>a</sup>  | 0.6 <sup>b*</sup>    | 0.7 <sup>b</sup>    | 2.2 <sup>a*</sup>  | 3.6 <sup>a</sup>  | 0.1 <sup>b*</sup>    | 0.9 <sup>b</sup>    | 0.1 <sup>b</sup>    | 0.7 <sup>c</sup>    | 0.1 <sup>b</sup>  | 0.9 <sup>c</sup>  |
| $PO$                    | 2.75 $\pm$        | 3.02 $\pm$        | 2.08 $\pm$           | 2.48 $\pm$          | 2.88 $\pm$         | 3.35 $\pm$        | 1.83 $\pm$           | 2.21 $\pm$          | 1.51 $\pm$          | 1.57 $\pm$          | 1.19 $\pm$        | 1.25 $\pm$        |
|                         | 0.13 <sup>a</sup> | 0.13 <sup>a</sup> | 0.11 <sup>a,b*</sup> | 0.11 <sup>a,b</sup> | 0.14 <sup>a*</sup> | 0.14 <sup>a</sup> | 0.13 <sup>b,c*</sup> | 0.13 <sup>b,c</sup> | 0.18 <sup>b,c</sup> | 0.18 <sup>b,c</sup> | 0.14 <sup>c</sup> | 0.14 <sup>c</sup> |

808 **FIGURE CAPTIONS**

809

810 **Figure. 1:** Experimental protocol used to examine the effects of temperature acclimation, and  
 811 acute changes in temperature on Atlantic cod *in situ* resting and maximum cardiac function.  
 812 After the *in situ* heart preparation was placed in the experimental bath at the fish's acclimation  
 813 temperature [with 5 nM adrenaline (AD) in the perfusate] and allowed to recover at a sub-  
 814 physiological output pressure (2 kPa) for 10 min, the output pressure head was increased to a  
 815 physiological value of 5 kPa for another 20 min. A period of 1 hour was then used to change  
 816 the temperature for the acutely challenged hearts, and these hearts were allowed a further 20  
 817 min. to stabilize at their test temperature before the maximum cardiac output test. This test  
 818 was performed by increasing input pressure in 4 steps (0.4, 0.5, 0.55 and finally 0.6 kPa), and  
 819 was followed immediately by a maximum power output test where the  $P_{IN}$  was left at 0.6 kPa  
 820 and was  $P_{OUT}$  dropped to 2 kPa before being increased in 1 kPa steps to 8 kPa. After these  
 821 initial tests, the hearts were allowed to recover for 20 min. and cardiac output set at the  
 822 appropriate resting level by adjusting  $P_{IN}$ . Thereafter, the adrenaline level in the perfusate was  
 823 increased to 200 nM AD, resting parameters were recorded after 3 - 5 minutes at the new  
 824 level of adrenaline, and a second set of maximum cardiac output and maximum power output  
 825 tests was performed. Note: the time line for fish that were tested at their acclimation  
 826 temperature was the same as described above.

827

828 **Figure 2:** Maximum values for heart rate (A), stroke volume (B), and cardiac output (C) for  
 829 Atlantic cod hearts tested at their acclimation temperature (0, 4 and 10°C) and after an acute  
 830 decrease or increase in temperature. Black bars indicate 5 nM adrenaline, while grey bars  
 831 indicate 200 nM adrenaline in the perfusate. Groups without a letter in common are  
 832 significantly different ( $p < 0.05$ ). Increasing the perfusate adrenaline concentration did not  
 833 significantly influence cardiac function in any group, although overall 200 nM adrenaline had  
 834 a slight, but significant, positive effect on cardiac output and stroke volume. Bars indicate one  
 835 s.e.m.  $N = 7-10$  except hearts from 4°C acclimated fish tested at 0°C where  $N = 4$ .

836

837 **Figure 3:** Maximum power output ( $PO_{max}$ ) for Atlantic cod hearts tested at their acclimation  
 838 temperature (0, 4 and 10°C) and after an acute decrease or increase in temperature (e.g. 4 at  
 839 10°C indicates hearts from 4°C acclimated fish that were tested at 10°C). Black bars indicate  
 840 5 nM adrenaline, while grey bars indicate 200 nM adrenaline, in the perfusate. Groups  
 841 without a letter in common are significantly different ( $p < 0.05$ ). Increasing the perfusate

adrenaline concentration did not significantly influence cardiac function in any group. Bars indicate one s.e.m. N = 7-10 except hearts from 4°C acclimated fish tested at 0°C where N = 4.

**Figure 4:** Cardiac (A) and power (B) output for Atlantic cod hearts during the maximum power output test. Hearts were tested at their acclimation temperature (0, 4 and 10°C) and after an acute decrease or increase in temperature (e.g. 4 at 10°C indicates hearts from 4°C acclimated fish that were tested at 10°C). In the maximum power output test, input pressure was maintained at 6 kPa, and diastolic output pressure was increased from 2 to 8 kPa. These data were obtained using 5 nM adrenaline. Note: Increasing the perfusate adrenaline concentration to 200 nM had no significant effect on either parameter, or on the shapes of the curves. At all  $P_{out}$  values, cardiac and power output for the 4°C acclimated fish tested at 10°C were significantly higher as compared to all other groups. Bars indicate one s.e.m. N = 7-10 except hearts from 4°C acclimated fish tested at 0°C where N = 4.

**Figure 5:** Atlantic cod (*Gadus morhua*) aerobic and cardiac scope as a function of acclimation temperature. Aerobic scope (net aerobic scope) calculated from Claireaux et al. (2000). All data are normalized to the maximum value that was reported over the presented temperature range.

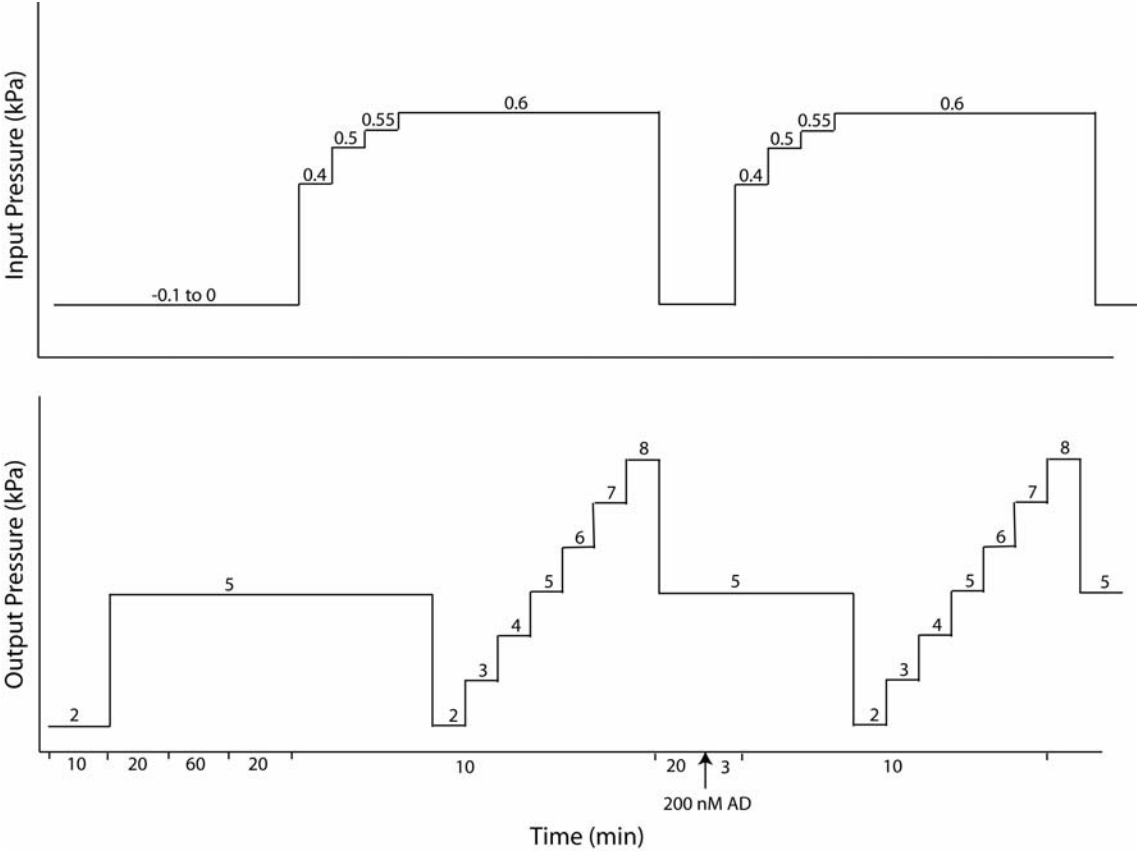

**Figure 1**

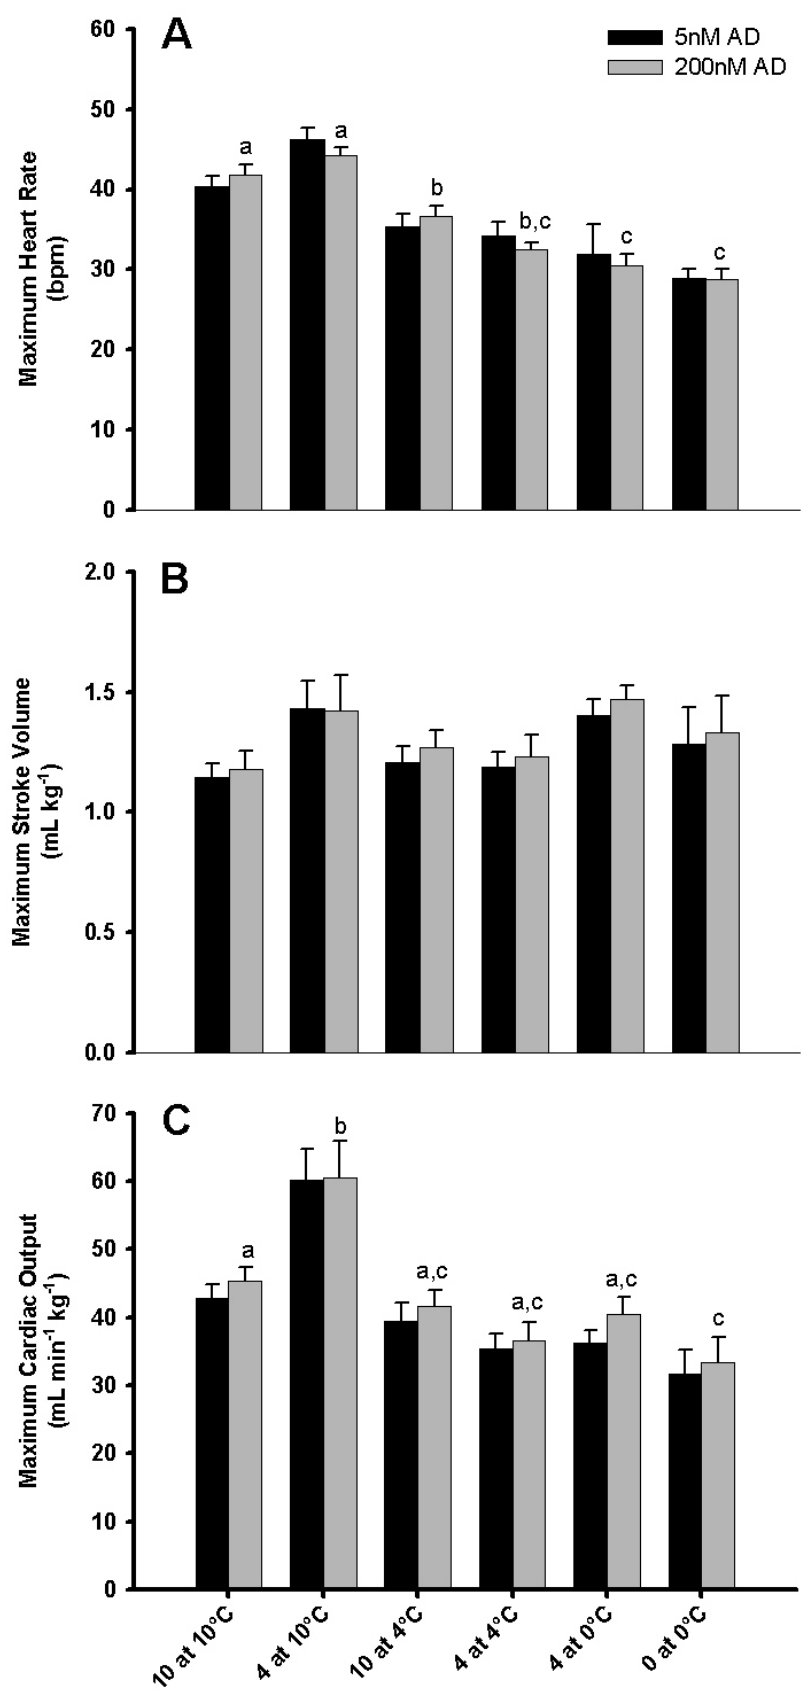

Figure 2

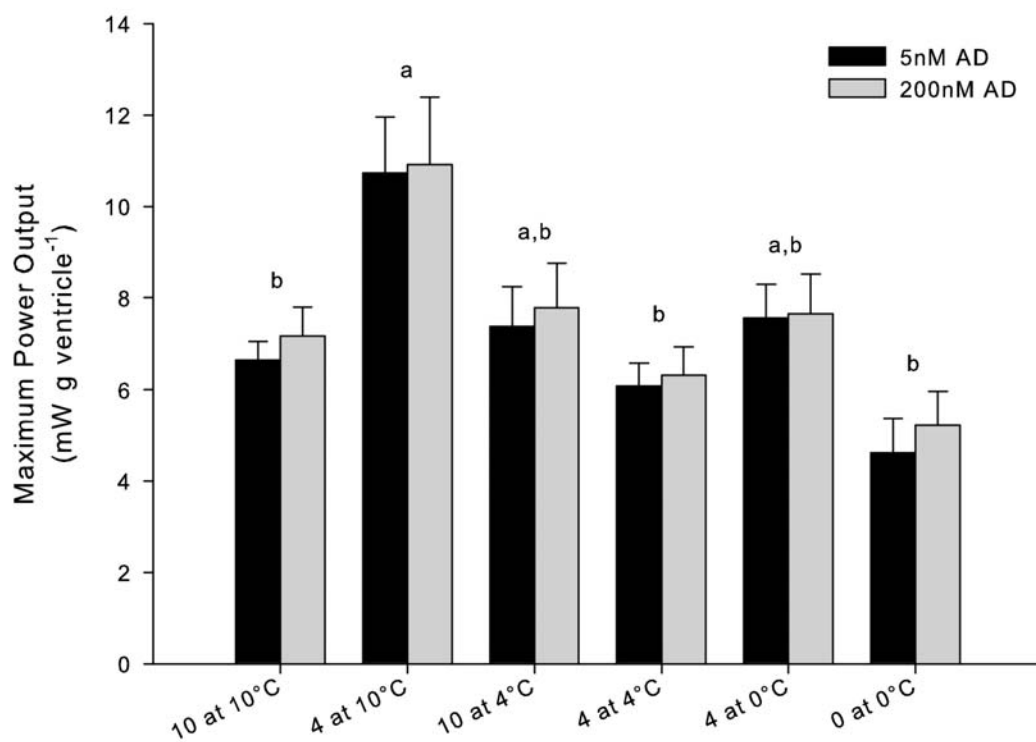

**Figure 3**



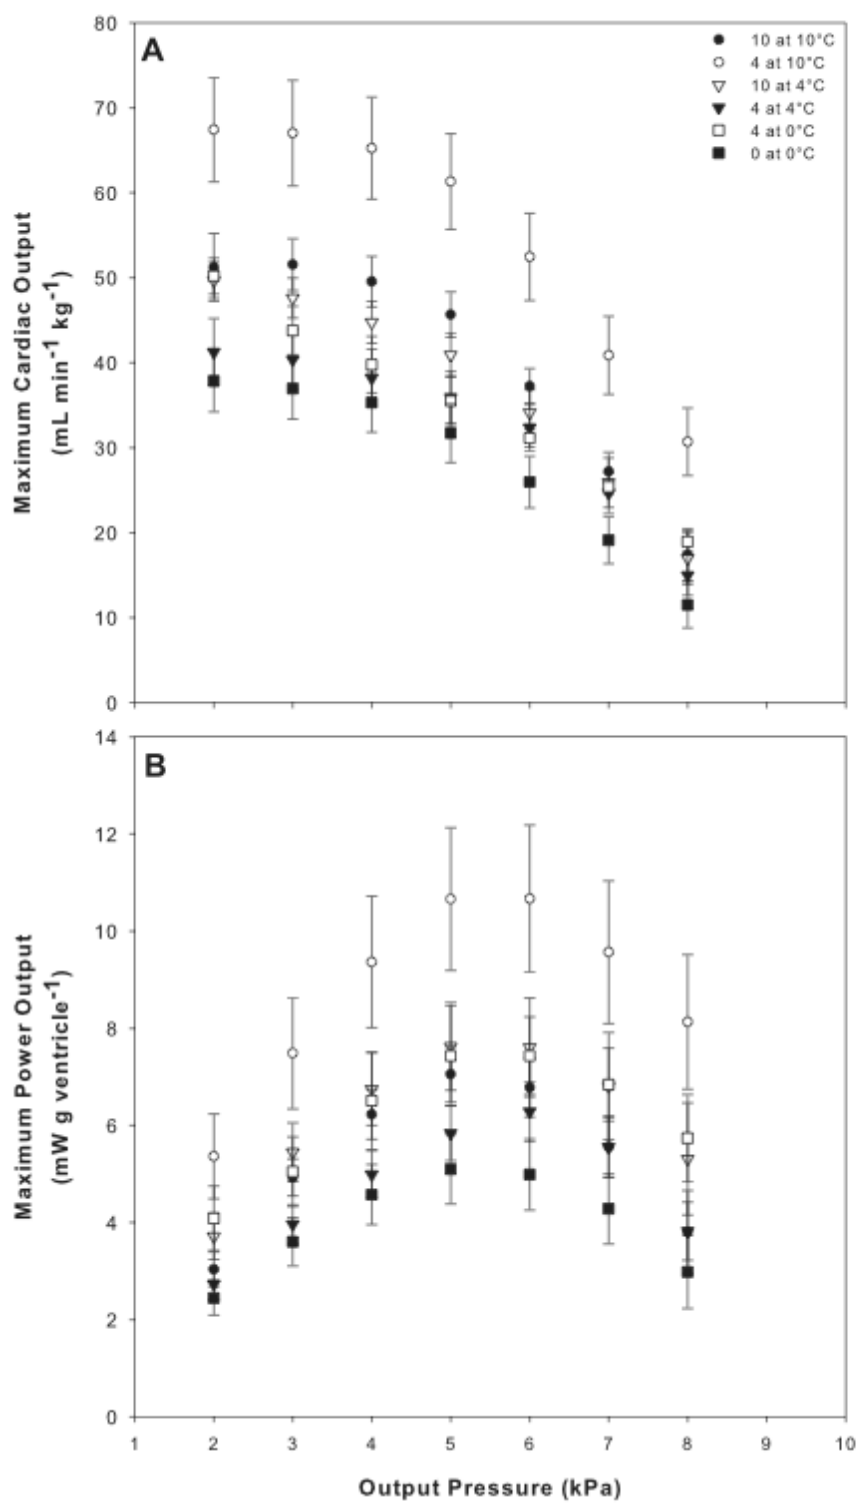

Figure 4

888

889

890

891

892

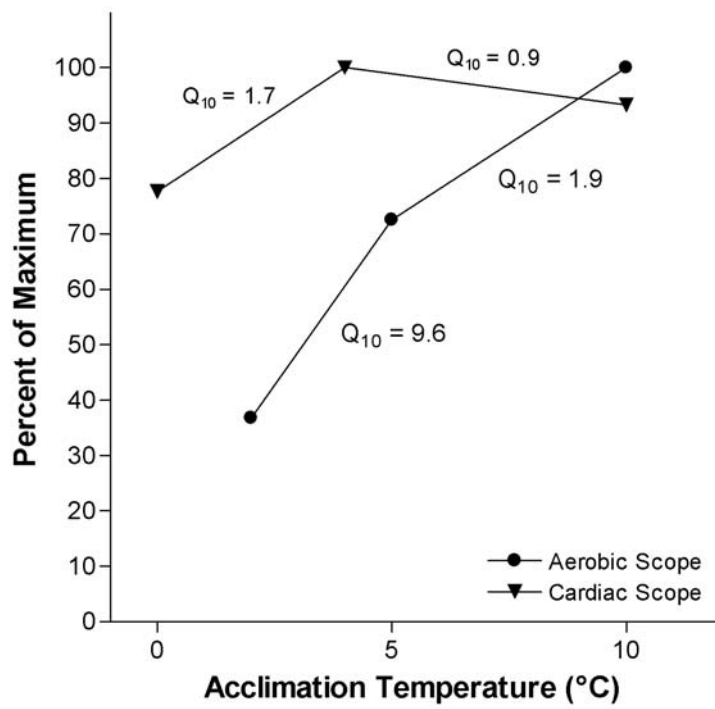

893

894

895 **Figure 5**

896
